# Supplementary material for: Protective Effect of Baicalin against Clostridioides difficile Infection in Mice
Source: Antibiotics (Basel). 2021 Jul 30;10(8):926. doi: 10.3390/antibiotics10080926 (PMC8388895; doi:10.3390/antibiotics10080926)
Supplement: Supplementary file 1 [file antibiotics-10-00926-s001.zip › antibiotics-1242390-supplementary.pdf]

Figure S1: Antibiotic-induced murine CDI model

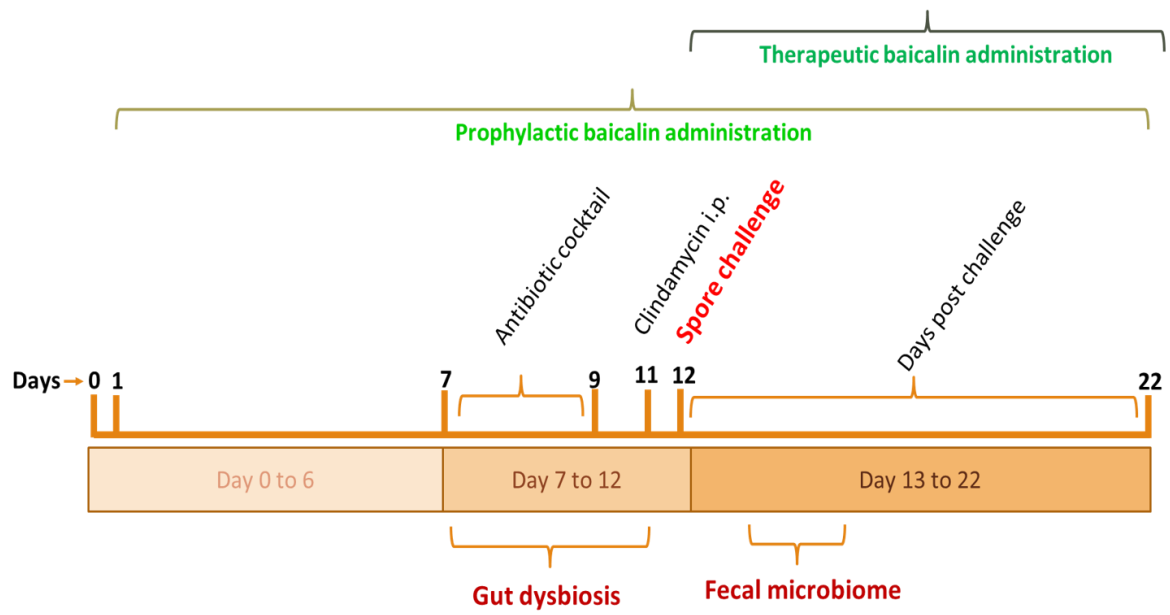

Figure S2: Mouse body condition chart

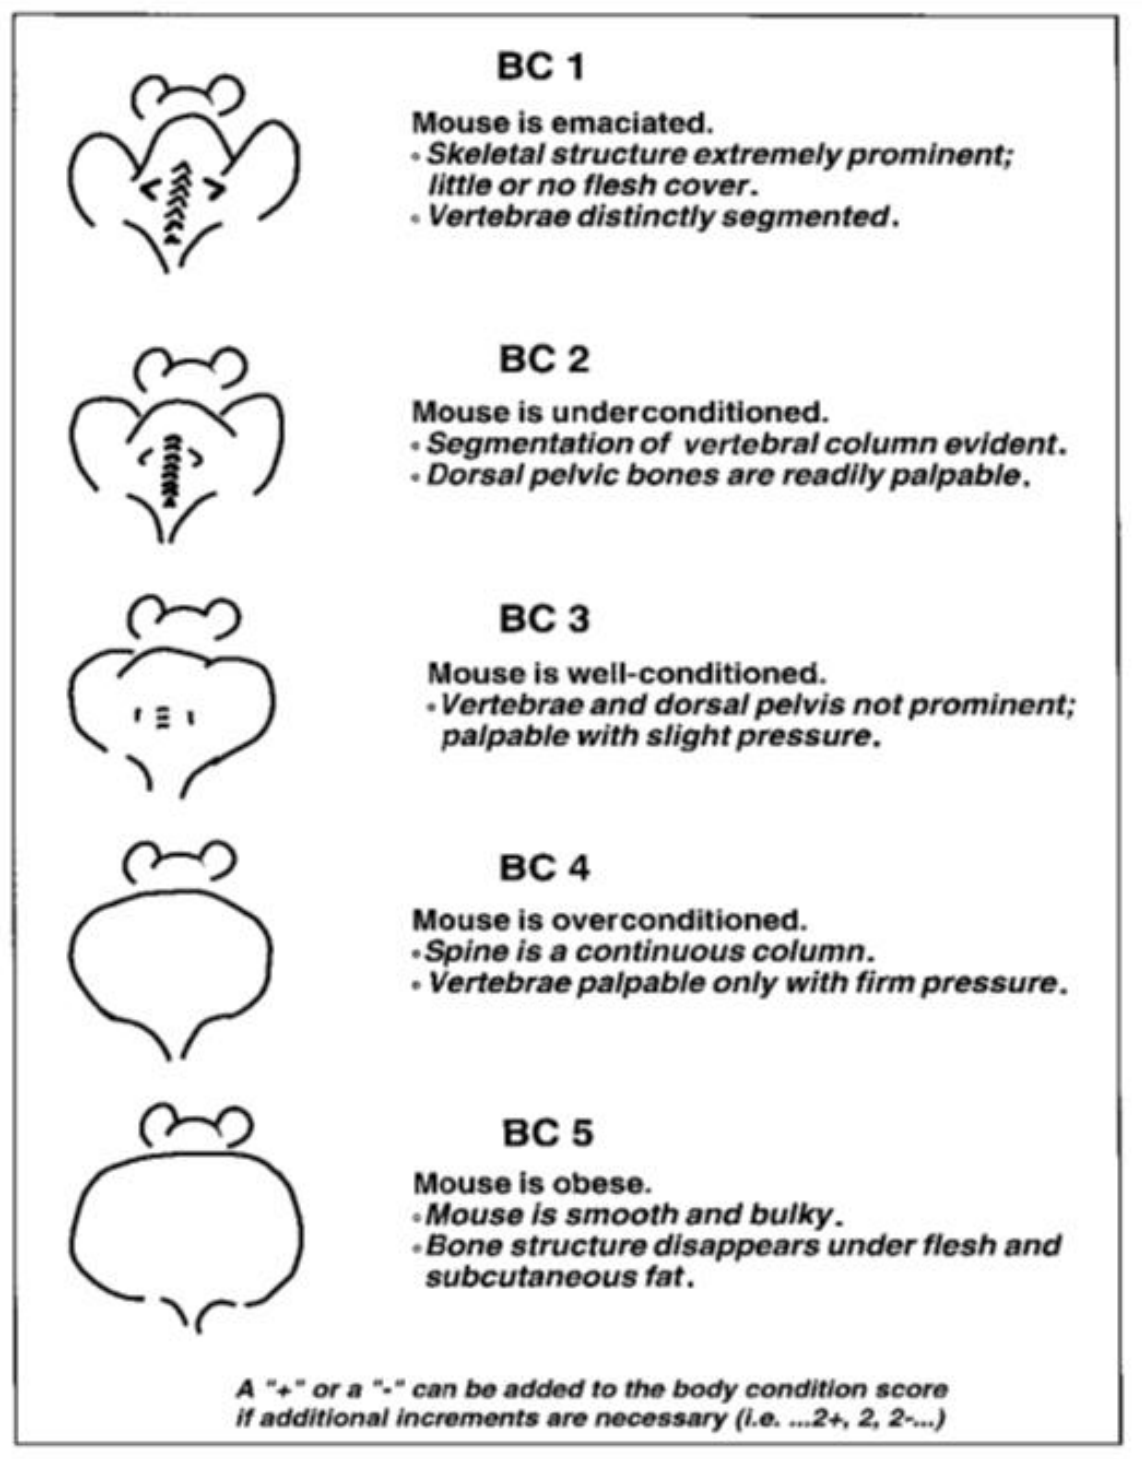

Figure S3: Mouse survival curves

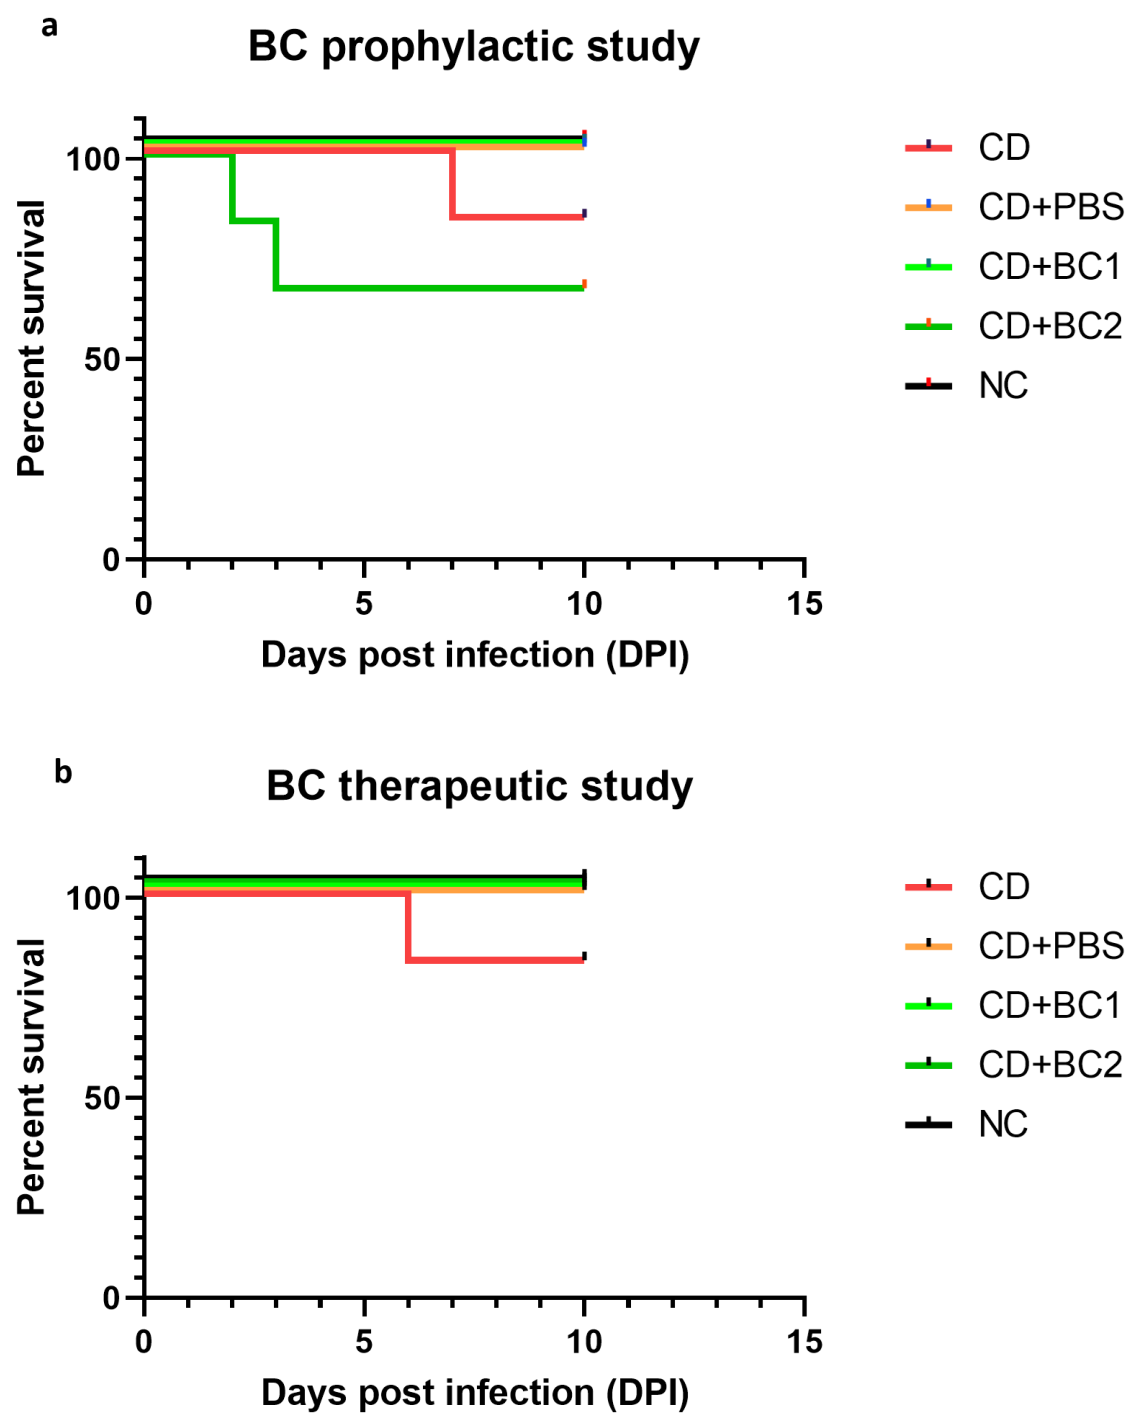

Table S1: Mouse clinical score sheet

| MOUSE CLINICAL SCORE SHEET                                                                                                                                                                                                    |        |                                                                   |                                                   |                                                  |
|-------------------------------------------------------------------------------------------------------------------------------------------------------------------------------------------------------------------------------|--------|-------------------------------------------------------------------|---------------------------------------------------|--------------------------------------------------|
|                                                                                                                                                                                                                               | 0      | 1                                                                 | 3                                                 | 5                                                |
| Coat                                                                                                                                                                                                                          | Normal | Lack of grooming                                                  | Rough/Ruffled fur                                 |                                                  |
| Activity                                                                                                                                                                                                                      | Normal | Isolated, abnormal posture                                        | Huddled/inactive                                  | Moribund, unresponsive or seizing                |
| Breathing                                                                                                                                                                                                                     | Normal | Rapid, shallow                                                    | Rapid, abdominal                                  | Laboured, blue                                   |
| Movement                                                                                                                                                                                                                      | Normal | Slight incoordination/ abnormality                                | Incoordinated, walking of toes, reluctant to move | Staggering, paralysis, lack of mobility          |
| Condition                                                                                                                                                                                                                     | BC 3   | BC 2+                                                             | BC 2                                              | BC 1                                             |
| Dehydration                                                                                                                                                                                                                   | Nil    | Skin less elastic                                                 | Skin tents                                        | Skin tents, eyes sunken                          |
| Feces                                                                                                                                                                                                                         | Normal | Moist faeces                                                      | Diarrhoea or dry faeces                           | Uncontrolled diarrhoea, Wet tail                 |
| Body Weight                                                                                                                                                                                                                   | Normal | Markedly reduced growth (e.g. severe runting)<br>5% over 24 hours | Weight loss up to 10% over 24 hours               | Weight loss >10% over 24 hours or >20% over time |
| <ul style="list-style-type: none"> <li>Moribund animals (A lack of responsiveness to manual stimulation, lack of mobility or inability or failure to eat or drink or a clinical score &gt; 25) will be euthanized.</li> </ul> |        |                                                                   |                                                   |                                                  |
